# Supplementary material for: Promotional effect of Fe on performance of Ni/SiO2for deoxygenation of methyl laurate as a model compound to hydrocarbons
Source: Royal Society of Chemistry journal article supplement (doi:10.1039/c4ra07932a), 2014-09-10
Supplement: c4ra07932a1.pdf [file c4ra07932a1.pdf]

***Supplementary material for:***

Promotional effect of Fe on performance of Ni/SiO<sub>2</sub> for deoxygenation  
of methyl laurate as a model compound to hydrocarbons

Xinbin Yu, Jixiang Chen\* and Tianyu Ren

Tianjin Key Laboratory of Applied Catalysis Science and Technology, Department of  
Catalysis Science and Engineering, School of Chemical Engineering and Technology,  
Tianjin University, Tianjin 300072, China

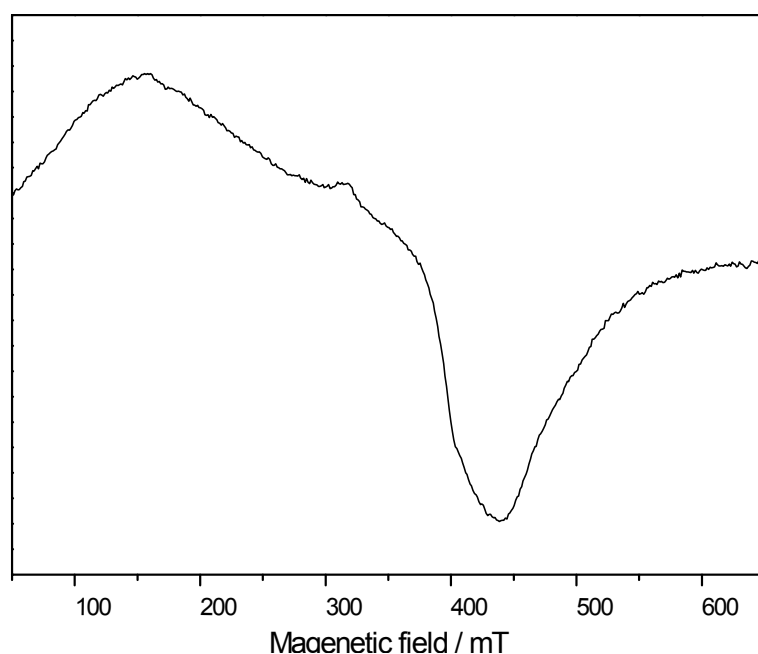

**Fig.S1.** ESR spectra of reduced FeNi(0.25)/SiO<sub>2</sub> sample recorded at room temperature

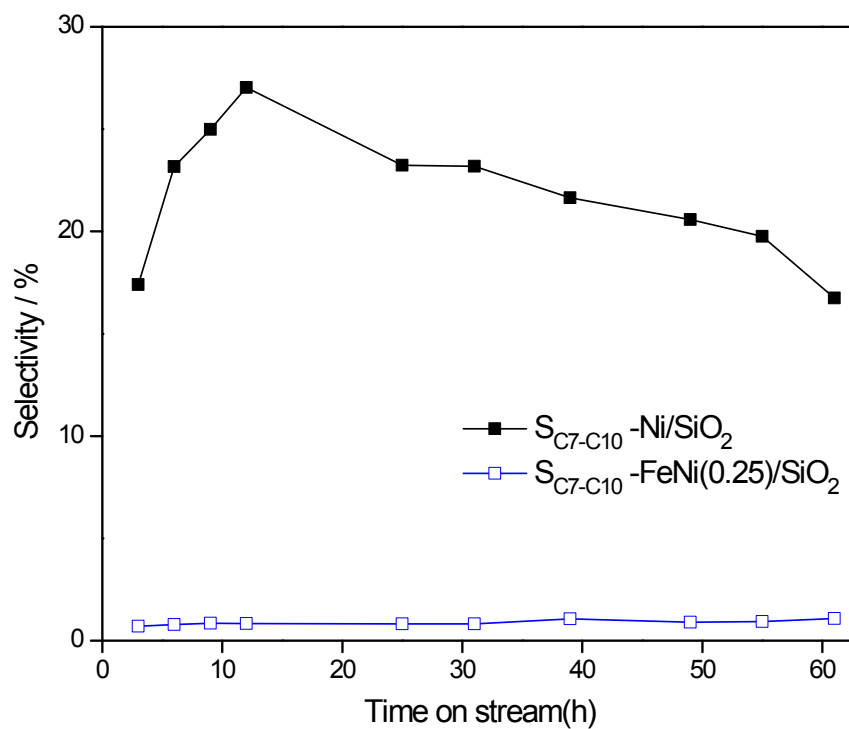

**Fig.S2.** Selectivity to C7-C10 on Ni/SiO<sub>2</sub> and FeNi(0.25)/SiO<sub>2</sub> as the function of time. Reaction conditions: 613 K, 3 MPa H<sub>2</sub>, WHSV of 10 h<sup>-1</sup>, H<sub>2</sub>/ methyl laurate molar ratio of 25.

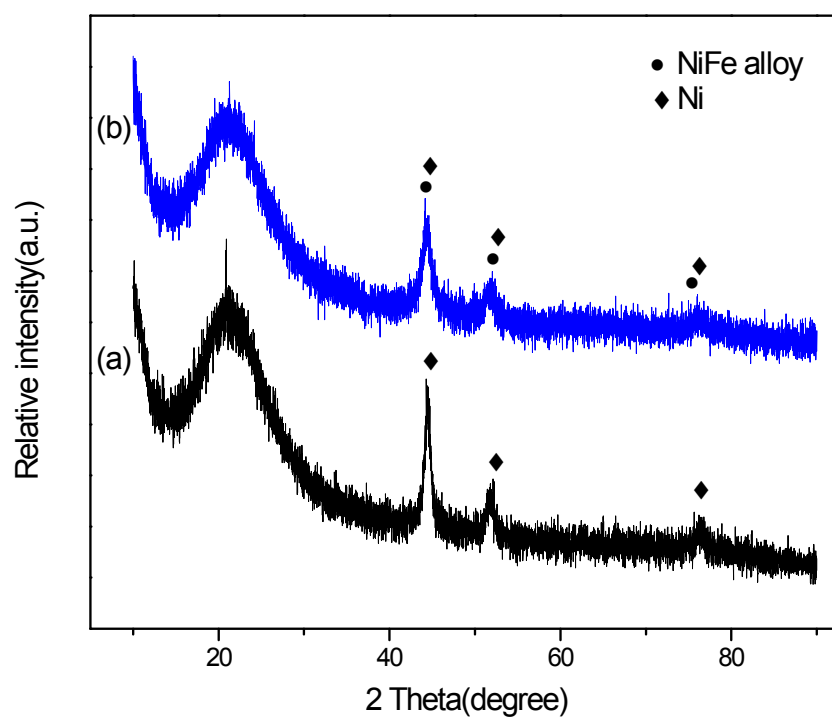

Fig.S3. XRD patterns of spent catalysts: (a) Ni/SiO<sub>2</sub>, (b) FeNi(0.25)/SiO<sub>2</sub>,

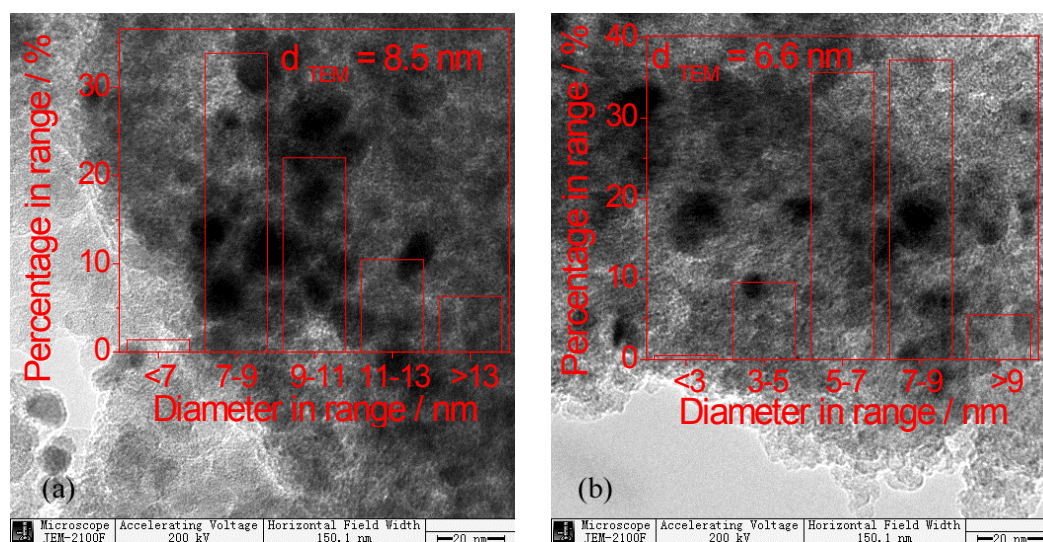

Fig.S4. TEM images of spent catalysts: (a) Ni/SiO<sub>2</sub>, (b) FeNi(0.25)/SiO<sub>2</sub>;

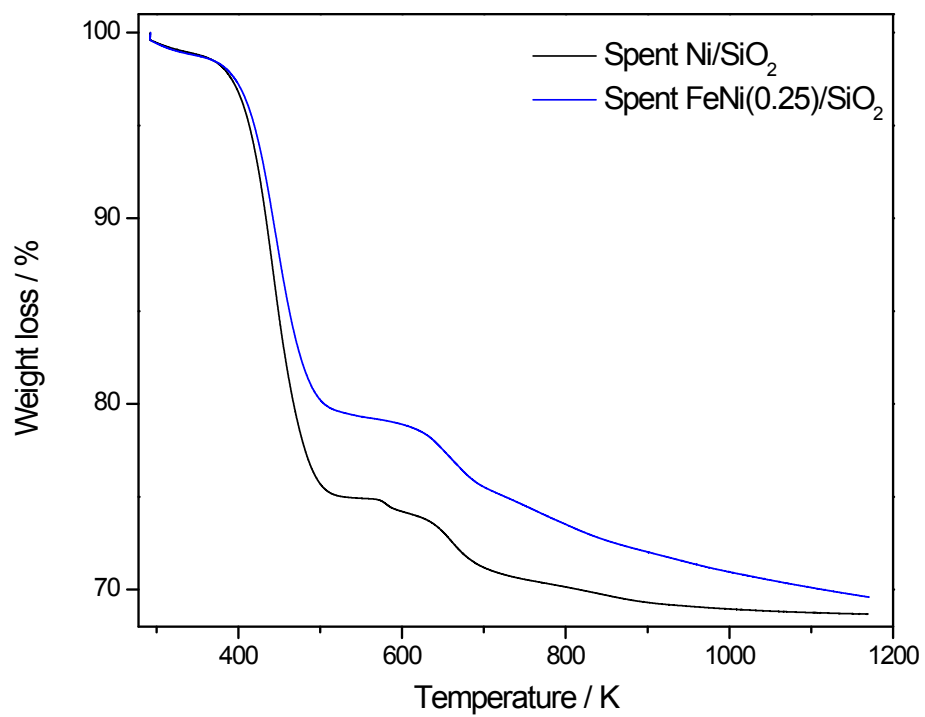

Fig.S5. TG curves of spent catalysts
